# Supplementary material for: Viruses in Skin Cancer (VIRUSCAN): Study Design and Baseline Characteristics of a Prospective Clinic-Based Cohort Study
Source: Oxford University Press journal article supplement (doi:10.1158/1055-9965.epi-19-0446), 2019-08-19
Supplement: 10559965epi190446-sup-220971_2_supp_5687747_pvmv5d.docx [file 10559965epi190446-sup-220971_2_supp_5687747_pvmv5d.docx]

| **Supplementary Table S1.** Human Papillomavirus and Polyomavirus Types Tested in the VIRUSCAN Study, Tampa FL, 2014-2018. | | | | |
| --- | --- | --- | --- | --- |
|  |  |  |  |  |
|  |  | **Viral DNA measured in skin swabs, eyebrow hairs and tumor tissue** |  | **Viral antibodies measured in serum** |
| **Beta HPV** |  |  |  |  |
| Species 1 | | 5, 8, 12, 14, 19, 20, 21, 24, 25, 36, 47, 93, 98, 99,105, 118, 124,143,152 |  | 5, 8, 12, 21, 24, 36, 93 |
|  |  |  |  |  |
| Species 2 | | 9, 15, 17, 22, 23, 37, 38, 80, 100, 104, 107, 110, 111, 113, 120, 122, 145, 151, 159, 174 |  | 9, 15, 17, 22, 23, 38, 80 |
|  |  |  |  |  |
| Species 3 | | 49, 75, 76, 115 |  | 75 |
|  |  |  |  |  |
| Species 4 | | 92 |  | 92 |
|  |  |  |  |  |
| Species 5 | | 96, 150 |  | 96 |
|  |  |  |  |  |
| **Gamma HPV** | | 4, 48, 50, 60, 65, 88, 95, 101, 103, 108, 109, 112, 116, 119, 121, 123, 126, 127, 128, 129, 130, 131, 132, 133, 134, 148, 149, 156, SD2, 161, 162, 163, 164, 165, 166, 167, 168, 169, 170, 171, 172, 173, 175, 178, 179, 180, 184, 197, 199, 200, 201 and 202 |  | 4, 48, 50, 60, 88, 101, 103 |
|  |  |  |  |  |
| **HPyV** |  | HPyV6, HPyV7, HPyV9, MCV and TSV |  | HPyV6, HPyV7, MCV, and TSV |
