# Supplementary material for: Viruses in Skin Cancer (VIRUSCAN): Study Design and Baseline Characteristics of a Prospective Clinic-Based Cohort Study
Source: Oxford University Press journal article supplement (doi:10.1158/1055-9965.epi-19-0446), 2019-08-19
Supplement: 10559965epi190446-sup-220971_2_supp_5687750_pvmc5d.docx [file 10559965epi190446-sup-220971_2_supp_5687750_pvmc5d.docx]

| **Supplementary Table S3.** Baseline Prevalence of Cutaneous Human Papillomavirus and Human Polyomavirus Infection in Eyebrow Hairs and Skin Swabs Among VIRUSCAN Study Participants, Tampa, FL 2014-2017. | | | | |
| --- | --- | --- | --- | --- |
|
|  |  |  |  |  |
| **Type of viral infectiona** | **% prevalence in eyebrow hair** |  | **% prevalence in the skin swabs** |  |
| Beta HPV |  |  |  |  |
| Any Beta HPV | 64.40 |  | 95.62 |  |
| Any Beta Species 1 | 41.15 |  | 80.54 |  |
| Beta HPV 5 | 14.30 |  | 36.58 |  |
| Beta HPV 8 | 7.59 |  | 20.14 |  |
| Beta HPV 12 | 7.10 |  | 18.00 |  |
| Beta HPV 14 | 0.88 |  | 4.86 |  |
| Beta HPV 19 | 3.40 |  | 12.26 |  |
| Beta HPV 20 | 2.24 |  | 9.24 |  |
| Beta HPV 21 | 7.10 |  | 20.43 |  |
| Beta HPV 24 | 7.78 |  | 25.00 |  |
| Beta HPV 25 | 0.78 |  | 3.99 |  |
| Beta HPV 36 | 3.31 |  | 9.14 |  |
| Beta HPV 47 | 3.02 |  | 10.21 |  |
| Beta HPV 93 | 0.39 |  | 3.31 |  |
| Beta HPV 98 | 6.52 |  | 19.84 |  |
| Beta HPV 99 | 0.78 |  | 4.18 |  |
| Beta HPV 105 | 5.25 |  | 15.95 |  |
| Beta HPV 118 | 0.19 |  | 2.92 |  |
| Beta HPV 124 | 7.00 |  | 22.08 |  |
| Beta HPV 143 | 0.49 |  | 2.04 |  |
| Beta HPV 152 | 0.58 |  | 1.36 |  |
| Any Beta Species 2 | 53.02 |  | 90.08 |  |
| Beta HPV 9 | 4.86 |  | 12.94 |  |
| Beta HPV 15 | 3.21 |  | 10.31 |  |
| Beta HPV 17 | 7.49 |  | 18.19 |  |
| Beta HPV 22 | 5.25 |  | 14.40 |  |
| Beta HPV 23 | 9.63 |  | 31.91 |  |
| Beta HPV 37 | 0.10 |  | 2.63 |  |
| Beta HPV 38 | 18.39 |  | 47.37 |  |
| Beta HPV 49 | 5.93 |  | 23.54 |  |
| Beta HPV 75 | 2.53 |  | 9.24 |  |
| Beta HPV 76 | 9.92 |  | 32.59 |  |
| Beta HPV 80 | 3.60 |  | 12.74 |  |
| Beta HPV 92 | 0.19 |  | 2.24 |  |
| Beta HPV 96 | 0.58 |  | 4.47 |  |
| Beta HPV 100 | 7.49 |  | 21.69 |  |
| Beta HPV 104 | 0.49 |  | 6.03 |  |
| Beta HPV 107 | 3.99 |  | 19.16 |  |
| Beta HPV 110 | 13.33 |  | 35.70 |  |
| Beta HPV 111 | 7.78 |  | 27.33 |  |
| Beta HPV 113 | 2.82 |  | 12.16 |  |
| Beta HPV 115 | 0.00 |  | 4.38 |  |
| Beta HPV 120 | 8.56 |  | 30.45 |  |
| Beta HPV 122 | 7.20 |  | 25.29 |  |
| Beta HPV 145 | 6.61 |  | 17.41 |  |
| Beta HPV 150 | 0.29 |  | 1.17 |  |
| Beta HPV 151 | 6.61 |  | 17.22 |  |
| Beta HPV 159 | 4.09 |  | 15.08 |  |
| Beta HPV 174 | 1.17 |  | 4.57 |  |
|  |  |  |  |  |
| Gamma HPV |  |  |  |  |
| Any Gamma HPV | 29.74 |  | 75.65 |  |
| Gamma HPV 4 | 3.08 |  | 18.00 |  |
| Gamma HPV 48 | 0.00 |  | 0.00 |  |
| Gamma HPV 50 | 3.46 |  | 15.30 |  |
| Gamma HPV 60 | 0.00 |  | 0.00 |  |
| Gamma HPV 65 | 0.00 |  | 1.15 |  |
| Gamma HPV 88 | 0.00 |  | 0.10 |  |
| Gamma HPV 95 | 1.83 |  | 0.87 |  |
| Gamma HPV 101 | 0.00 |  | 0.00 |  |
| Gamma HPV 103 | 0.00 |  | 0.00 |  |
| Gamma HPV 108 | 0.10 |  | 0.48 |  |
| Gamma HPV 109 | 0.00 |  | 0.10 |  |
| Gamma HPV 112 | 0.00 |  | 0.29 |  |
| Gamma HPV 116 | 0.00 |  | 0.00 |  |
| Gamma HPV 119 | 0.00 |  | 0.00 |  |
| Gamma HPV 121 | 0.29 |  | 5.20 |  |
| Gamma HPV 123 | 0.87 |  | 5.77 |  |
| Gamma HPV 126 | 0.10 |  | 0.67 |  |
| Gamma HPV 127 | 0.19 |  | 2.12 |  |
| Gamma HPV 128 | 3.08 |  | 12.22 |  |
| Gamma HPV 129 | 0.19 |  | 3.18 |  |
| Gamma HPV 130 | 2.60 |  | 10.20 |  |
| Gamma HPV 131 | 0.29 |  | 0.48 |  |
| Gamma HPV 132 | 1.06 |  | 4.81 |  |
| Gamma HPV 133 | 2.41 |  | 8.18 |  |
| Gamma HPV 134 | 1.25 |  | 6.54 |  |
| Gamma HPV 148 | 0.67 |  | 6.35 |  |
| Gamma HPV 149 | 3.08 |  | 12.90 |  |
| Gamma HPV 156 | 3.18 |  | 11.74 |  |
| Gamma HPV 161 | 0.77 |  | 5.49 |  |
| Gamma HPV 162 | 0.19 |  | 4.81 |  |
| Gamma HPV 163 | 0.19 |  | 1.15 |  |
| Gamma HPV 164 | 0.87 |  | 2.21 |  |
| Gamma HPV 165 | 0.10 |  | 0.48 |  |
| Gamma HPV 166 | 0.10 |  | 2.12 |  |
| Gamma HPV 167 | 1.54 |  | 7.41 |  |
| Gamma HPV 168 | 1.44 |  | 7.70 |  |
| Gamma HPV 169 | 1.35 |  | 6.54 |  |
| Gamma HPV 170 | 0.58 |  | 1.35 |  |
| Gamma HPV 171 | 0.00 |  | 0.38 |  |
| Gamma HPV 172 | 1.54 |  | 7.60 |  |
| Gamma HPV 173 | 2.02 |  | 6.26 |  |
| Gamma HPV 175 | 2.02 |  | 8.76 |  |
| Gamma HPV 178 | 0.38 |  | 2.31 |  |
| Gamma HPV 179 | 1.54 |  | 8.18 |  |
| Gamma HPV 180 | 1.06 |  | 7.70 |  |
| Gamma HPV 184 | 0.48 |  | 1.35 |  |
| Gamma HPV 197 | 0.96 |  | 2.21 |  |
| Gamma HPV 199 | 1.54 |  | 5.20 |  |
| Gamma HPV 200 | 0.58 |  | 3.56 |  |
| Gamma HPV 201 | 0.96 |  | 4.81 |  |
| Gamma HPV 202 | 0.29 |  | 0.87 |  |
| Gamma HPV SD2 | 4.14 |  | 19.35 |  |
|  |  |  |  |  |
| Any HPyV | 35.83 |  | 82.13 |  |
| HPyV 6 | 6.82 |  | 30.36 |  |
| HPyV 7 | 0.67 |  | 2.69 |  |
| HPyV 9 | 0.29 |  | 0.10 |  |
| MCV | 31.12 |  | 74.74 |  |
| TSV | 0.29 |  | 2.40 |  |
| Abbreviations: HPV, human papillomavirus; HPyV, human polyomavirus; MCV, Merkel cell polyomavirus; TSV, Trichodysplasia spinulosa-associated polyomavirus. | | | | |
| aThe HPV prevalence is presented for participants who had a skin swab and eyebrow hair available for HPV genotyping. | | | | |
